# Supplementary material
Source: HighWire-hosted journal article supplement (https://cmaj.ca/highwire/filestream/57829/field_highwire_adjunct_files/0/neuro-aan-fb1-fe.pdf)
Supplement: neuro-aan-fb1-fe.pdf [file neuro-aan-fb1-fe.pdf]

**Appendix 1** (as supplied by the authors): Key terms

|                                         |                                                                                                                                                                                                                                                         |
|-----------------------------------------|---------------------------------------------------------------------------------------------------------------------------------------------------------------------------------------------------------------------------------------------------------|
| Allele                                  | One of a series of different forms of a gene existing in a population                                                                                                                                                                                   |
| Amygdala                                | A brain structure consisting of multiple groups of neurons located deep underneath the cortex of the brain and thought to play a role in emotional learning                                                                                             |
| Anhedonia                               | An inability to experience pleasure in normally pleasurable situations                                                                                                                                                                                  |
| Apoptosis                               | An ordered sequence of chemical reactions leading to a variety of changes in and ultimate death of a cell                                                                                                                                               |
| Brain-derived neurotrophic factor       | A protein that encourages the growth and specialization of new neurons and helps to support the survival of existing neurons                                                                                                                            |
| Corticotropin-releasing factor          | A peptide, secreted by the hypothalamus in response to stress, which stimulates release of corticotropin from the pituitary                                                                                                                             |
| Epigenetics                             | A change in gene expression that involves modifications to DNA and supporting proteins but that does not involve change in the actual DNA sequence of a gene                                                                                            |
| Glia                                    | Cells with a variety of functions including support and protection of neurons                                                                                                                                                                           |
| Glucocorticoid receptor                 | A protein activated by cortisol which regulates genes controlling a wide variety of processes involved in metabolism and maintenance of homeostasis                                                                                                     |
| Growth factor                           | A naturally occurring protein released by cells to stimulate growth and specialization of other cells                                                                                                                                                   |
| Hippocampus                             | A brain region below the cortex thought to play a role in various brain functions including memory                                                                                                                                                      |
| Hypothalamus                            | A brain region located just above the brain stem which links the central nervous system to the endocrine system by secreting factors that stimulate or inhibit the release of hormones from the pituitary                                               |
| Limbic system                           | A set of brain regions including the hippocampus and amygdala that are thought to support a variety of emotional, behavioral, and cognitive functions                                                                                                   |
| Neuroimaging                            | The use of a technique to visualize the structure or function of the brain                                                                                                                                                                              |
| Pharmacogenetics                        | The study of genetic variation that gives rise to different responses or tolerability to drugs between individuals                                                                                                                                      |
| Pituitary                               | An endocrine gland at the base of the brain which secretes hormones, including hormones that stimulate other endocrine glands                                                                                                                           |
| Polymorphism                            | The existence of more than one form of a gene in a population                                                                                                                                                                                           |
| Raphe nuclei                            | A brain structure consisting of multiple groups of neurons in the brain stem involved in synthesis and release of the neurotransmitter serotonin                                                                                                        |
| Selective serotonin reuptake inhibitors | A class of antidepressant drugs which primarily influence the brain serotonin system                                                                                                                                                                    |
| Serotonin transporter                   | A protein that transports the neurotransmitter serotonin from the synaptic cleft back into the presynaptic serotonin neurons from which it was released.                                                                                                |
| Signal transduction                     | A process by which a cell converts a signal or stimulus into another by means of ordered sequences of chemical reactions driven by enzymes                                                                                                              |
| Synapse                                 | Specialized chemical junctions which allow nerve cells to communicate and form interconnected circuits with each other                                                                                                                                  |
| Transcription                           | The process of copying DNA with the purpose of translating it into a protein                                                                                                                                                                            |
| Tryptophan depletion                    | An experimental procedure in which participants ingest a mixture of amino acids that lacks tryptophan, the amino acid used to synthesize the neurotransmitter serotonin, thereby resulting in a temporary reduction in levels of serotonin in the brain |
